# Supplementary material
Source: PubMed Central journal article supplement (PMC2934632)
Supplement: supp_M110.130625_jbc.M110.130625-1.pdf [file supp_M110.130625_jbc.M110.130625-1.pdf]

Computer modeling of agrin G3 domain structure — The structural models were built by using the homology modeling function of Swiss-PdbViewer V3.7 b2 [1]. The crystal structure of  $\alpha$ L2LG5 (PDB code: 1DYKA) was selected as the template and the sequence alignment of AgG3 and  $\alpha$ L2LG5 was adjusted according to their secondary structures (see below for sequence alignment, [2]). The modeling request was submitted to Swiss-Model server and the modeling results were presented by PdbViewer.

```
L2Lg5      -----SGTYFDGTGFAKAVGGFKVG-----LDLLVEFEFRTRRPTGVLLGI
AgG3  1757  EFPVGDLETLAFDGRTYIEYLNNAVIESELTNEIPA EKALQSNHFELSLRTEATQGLVLWI
```

```
L2Lg5      -----SGTYFDGTGFAKAVGGFKVG-----LDLLVEFEFRTRRPTGVLLGI
AgG3  1824  GKAAERADYMALAIVDGHLQLSYDLGSQPVVLRSTV----KVNTNRWLRIRAHREHREGS
```

```
L2LG5      LVVD-GNQVDAQSPNSASTSADTNDPVFVGGFPG--GLNQFGLTTNIRFRGCIRSLKLTK
AgG3  1880  LQVGNEAPVTGSSP-LGATQLD TDGALWLGGLQKLPVGQALPKAYGTGFVGC LRDVVVG-
```

#### References

- [1] Guex, N. and Peitsch, M.C. (1997). SWISS-MODEL and the Swiss-PdbViewer: an environment for comparative protein modeling. *Electrophoresis* 18, 2714-23.
- [2] Hohenester, E., Tisi, D., Talts, J.F. and Timpl, R. (1999). The crystal structure of a laminin G-like module reveals the molecular basis of alpha-dystroglycan binding to laminins, perlecan, and agrin. *Molecular Cell* 4, 783-92.
